# Supplementary material for: MicroRNA-320a sensitizes tamoxifen-resistant breast cancer cells to tamoxifen by targeting ARPP-19 and ERRγ*
Source: PubMed Central journal article supplement (PMC4348640; doi:10.1038/srep08735), 2015-03-04
Supplement: srep08735-s1.pdf [file srep08735-s1.pdf]

**Supplementary information**

MicroRNA-320a sensitizes tamoxifen-resistant breast cancer cells to tamoxifen by targeting ARPP-19 and ERR $\gamma$ \*

**Mingrong Lü<sup>a,b,#</sup>, Keshuo Ding<sup>a,b,c,#</sup>, Guofeng Zhang<sup>d</sup>, Mianmian Yin<sup>a,b</sup>, Guidong Yao<sup>e</sup>,  
Hui Tian<sup>a,b</sup>, Jie Lian<sup>a,b</sup>, Lin Liu<sup>a,b</sup>, Meng Liang<sup>a,b</sup>, Tao Zhu<sup>a,b</sup>, Fei Sun<sup>a,b</sup>**

Supplementary Figure S1

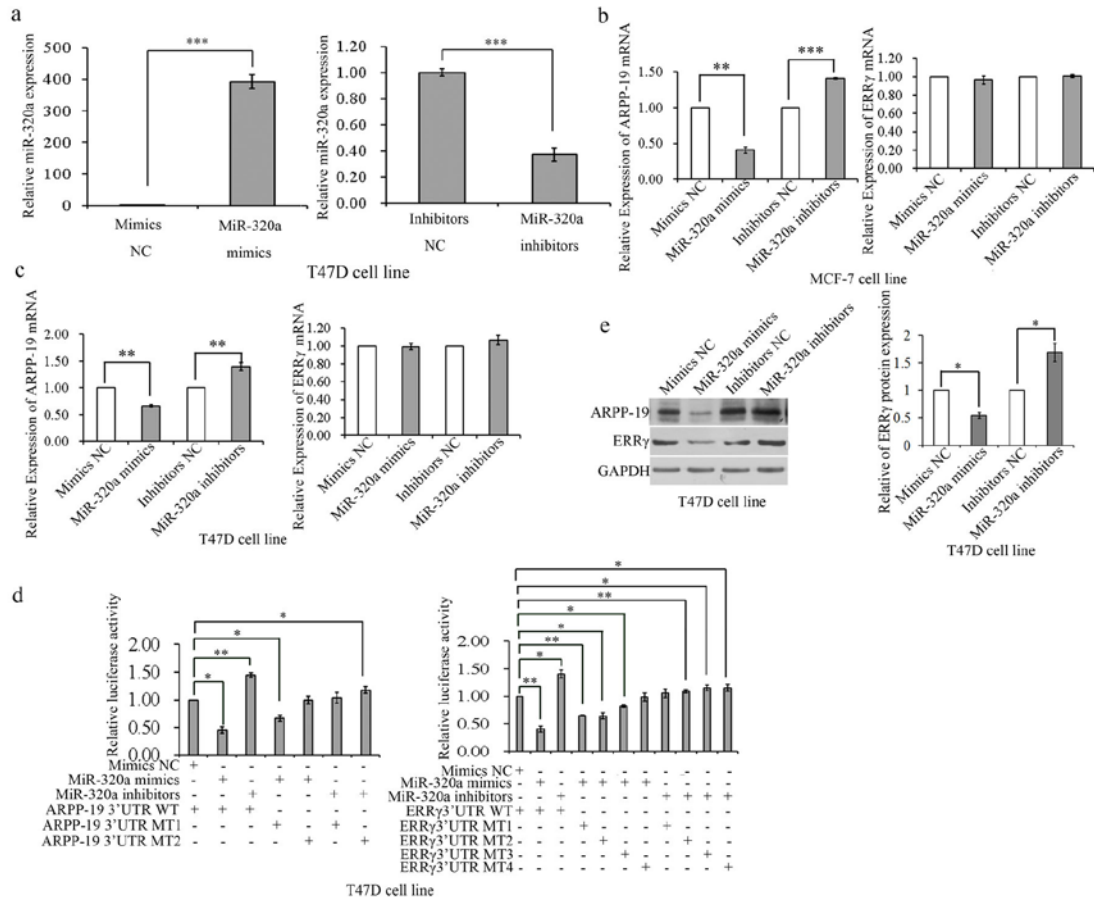

Figure S1. miR-320a directly targets ARPP-19 and ERR $\gamma$  in T47D cell line. a. Real-time PCR analysis of miR-320a expression in T47D cells when transfected with miR-320a mimics or inhibitors. b and c. The expression levels of ARPP-19 and ERR $\gamma$  mRNA were examined by real time PCR after transfected with miR-320a mimics or inhibitors for 48h in MCF-7 and T47D cells. d. Luciferase activity of luciferase gene fusing with wild-type or mutant 3'UTRs of ARPP-19 or ERR $\gamma$  were measured after co-transfection with miR-320a mimics or inhibitors in T47D cell line. The luciferase activity was normalized with firefly luciferase activity. e. Western blot analysis of the expression levels of ARPP-19 and ERR $\gamma$  in T47D cells transfected with miR-320a mimics or inhibitors and the densitometric analysis of ERR $\gamma$  protein levels. Results are presented as an average of at least three replicates. \*P < 0.05, \*\*P < 0.01, \*\*\*P < 0.001.

Supplementary Figure S2

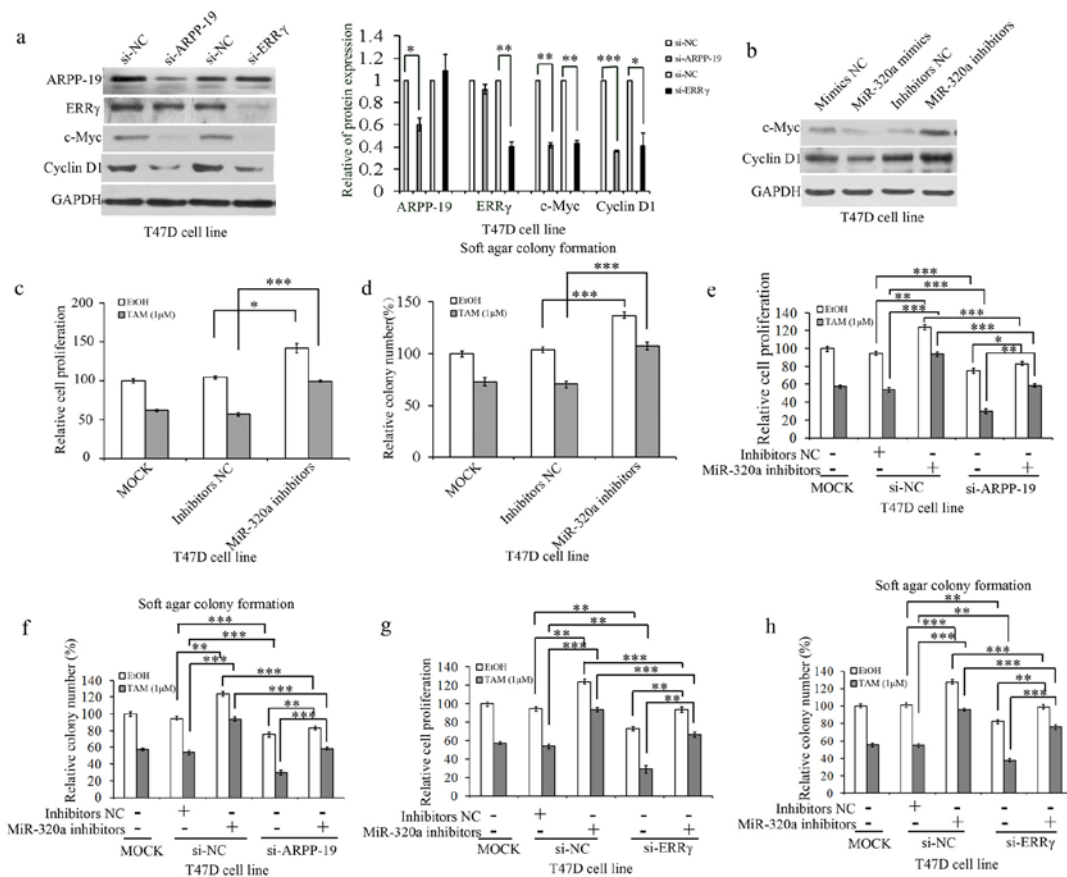

Figure S2. Knockdown of miR-320a reduced sensitivity of tamoxifen in T47D cells. a. Western blot analysis of ARPP-19, ERR $\gamma$ , c-Myc, and Cyclin D1 expression levels in T47D cells transfected with si-ARPP-19 and si-ERR $\gamma$  and the corresponding densitometric analysis. b. Western blot analysis of c-Myc and Cyclin D1 expression levels in T47D cells transfected with miR-320a mimics / inhibitors. c and d. Cell viability (c) and soft agar colony formation (d) analysis of T47D cells transfected with miR-320a inhibitors. e and f. Cell viability (e) and soft agar colony formation (f) analysis of T47D cells transfected with si-ARPP-19 and miR-320a inhibitors and co-transfected with si-ARPP-19 and miR-320a inhibitors on exposure to tamoxifen or not. g and h. Cell viability (g) and soft agar colony formation (h) analysis of T47D cells transfected with si-ERR $\gamma$  and miR-320a inhibitors and co-transfected

with si-ERR $\gamma$  and miR-320a inhibitors on exposure to tamoxifen or not. Results are presented as an average of at least three replicates. \*P < 0.05, \*\*P < 0.01, \*\*\*P < 0.001.

Supplementary Figure S3

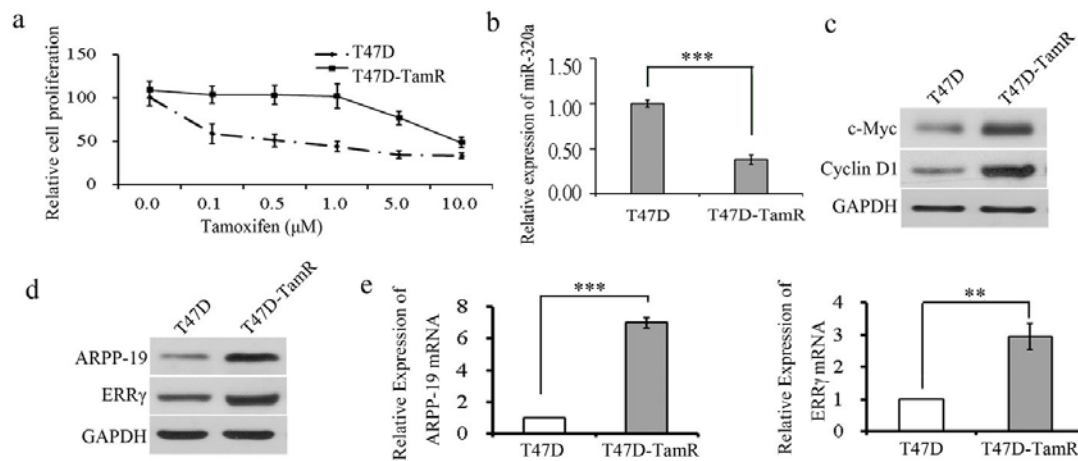

Figure S3. Tamoxifen resistant cell lines had a low level of miR-320a and a high level of c-Myc, Cyclin D1, ARPP-19, and ERR $\gamma$ . a. Cell viability analysis of T47D-TamR cells as well as its parental cells treated with different doses of tamoxifen. b. Real-time PCR analysis of miR-320a expression in TamR cells compared with parental cells. c and d. Western blot analysis of the expression of c-Myc, Cyclin D1, ARPP-19 and ERR $\gamma$  in T47D-TamR cells as well as parental cells. e. Real-time PCR analysis of ARPP-19 and ERR $\gamma$  mRNA expression in TamR cells compared with parental cells. Results are presented as an average of at least three replicates. \*\*P < 0.01, \*\*\*P < 0.001.

## Supplementary Figure S4

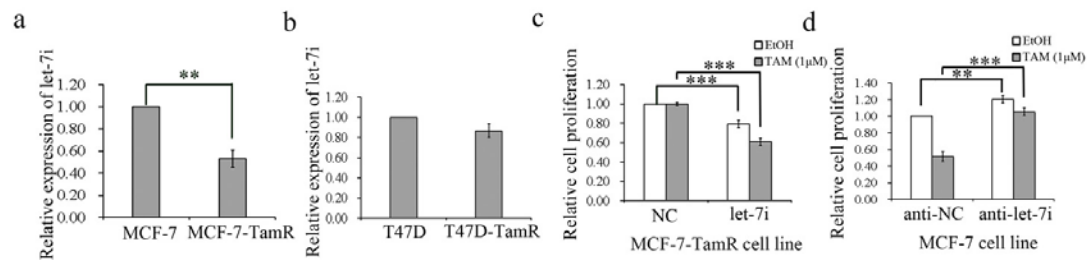

Figure S4. The expression of let-7i is reduced in MCF-7-TamR cells compared with MCF-7 cell but not changed in T47D cells compared with parental cells and re-expression of let-7i in MCF-7-TamR cells sensitizes cells to tamoxifen while knock-down of let-7i promotes resistance to tamoxifen in WT cells. a and b, Real-time PCR analysis of let-7i expression in TamR cells compared with their parental cells. c and d, Cell viability analysis of MCF-7-TamR cells transfected with let-7i mimics and transfected with let-7i inhibitors in MCF-7 cells. Results are presented as an average of three replicates. \*\*P < 0.01, \*\*\*P < 0.001, determined by one-way ANOVA.

## Supplementary Figure S5

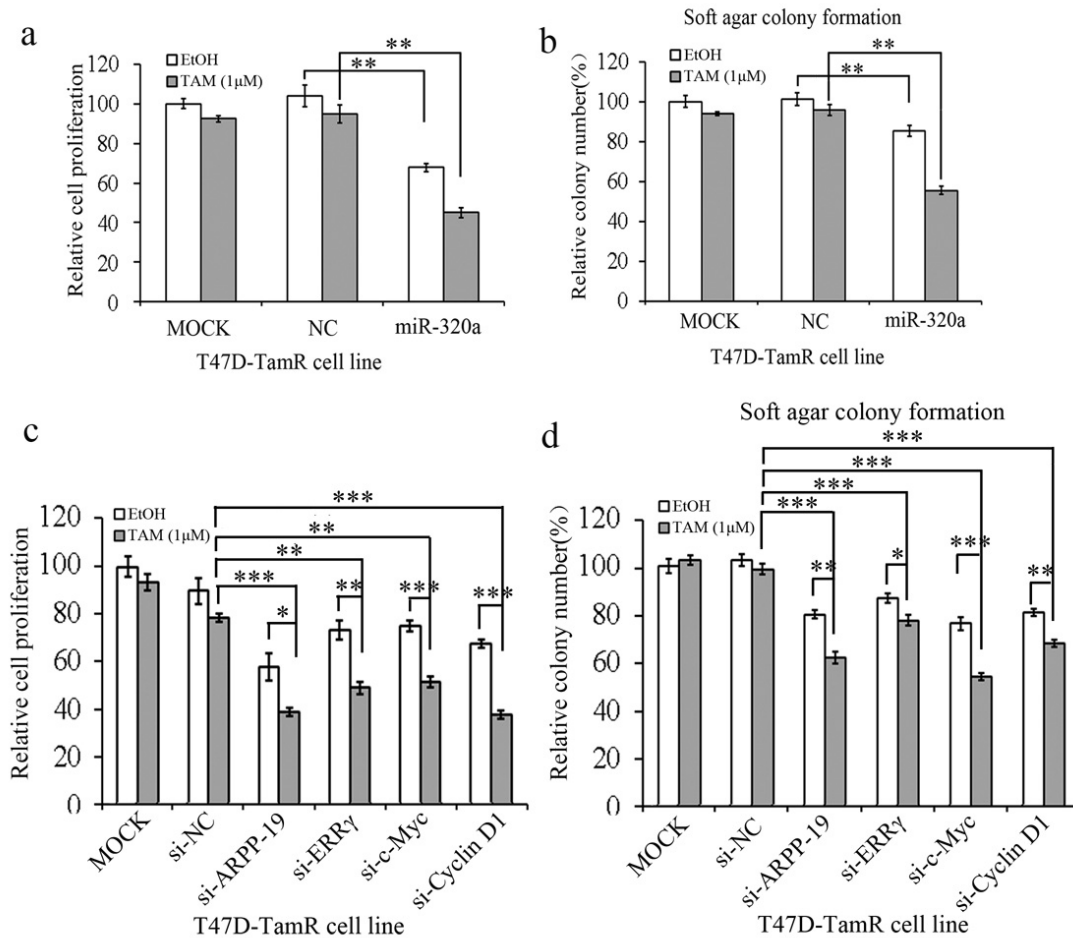

Figure S5. Re-expression of miR-320a or knockdown of its targets in TamR cells sensitizes these cells to tamoxifen. a and b. Cell viability (a) and soft agar colony formation (b) analysis of TamR cells transfected with miR-320a mimics. c and d. Cell viability (c) and soft agar colony formation (d) analysis of TamR cells transfected with si-ARPP-19, -ERR $\gamma$ , -c-Myc, and -Cyclin D1. Results are shown as the average and s.d. of at least three biological and two technical replicates each, \* $P < 0.05$ , \*\* $P < 0.01$ , \*\*\* $P < 0.001$ .

## Supplementary Figure S6

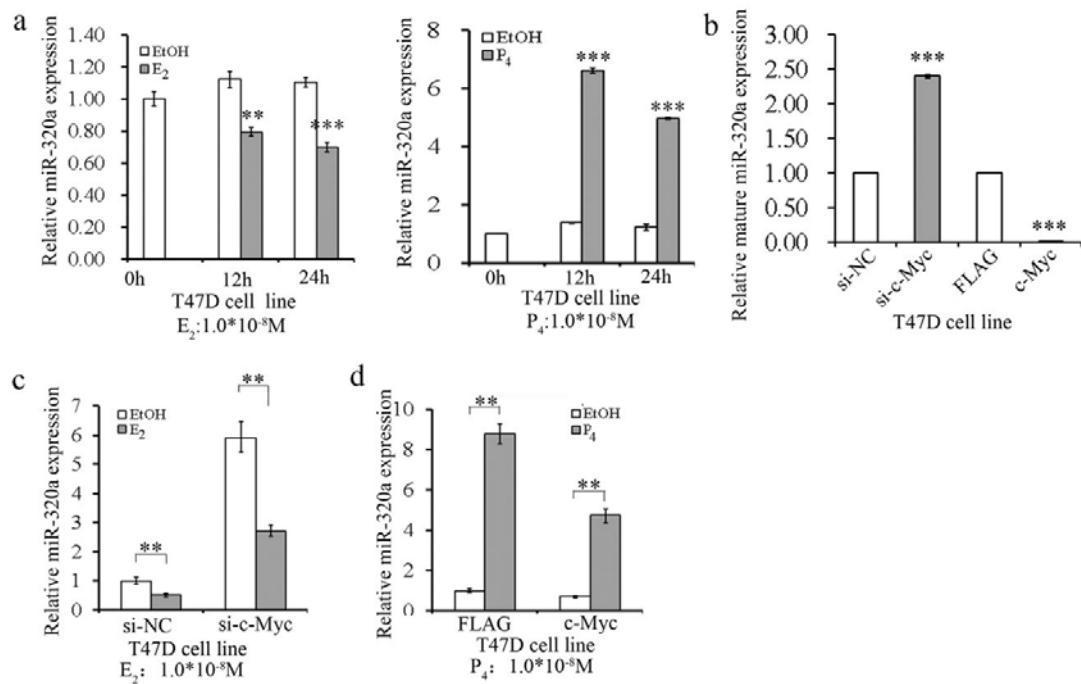

Figure S6. c-Myc mediates progesterone (P<sub>4</sub>) and estrogen (E<sub>2</sub>)-regulated miR-320a expression. a. Real-time PCR analysis of miR-320a expression levels in T47D cells treated with E<sub>2</sub> or P<sub>4</sub> for 0 h, 12 h, and 24 h. b. Real-time PCR analysis of miR-320a expression levels in T47D cells transfected with either c-Myc specific siRNA or c-Myc-flag (c-Myc) overexpression plasmids. c and d. Real-time PCR analysis of miR-320a expression levels in T47D cells transfected with si-c-Myc (c)/ c-Myc overexpression plasmids (d) for 24h and followed with stimulation with E<sub>2</sub> (c)/ P<sub>4</sub> (d). Results are presented as an average of at least three replicates. \*P < 0.05, \*\*P < 0.01, \*\*\*P < 0.001.

Supplementary Table 1 Expression of the indicated proteins or miR-320a in 31 breast cancer samples using immunohistochemistry (IHC) or real-time PCR.

| Expression of the indicated proteins | ER+/PR+ | ER+/PR- | ER-/PR+ | ER-/PR- |
|--------------------------------------|---------|---------|---------|---------|
| HER2:-/+                             | 13      | 0       | 1       | 2       |
|                                      | 7↑ 6↓   |         | 1↓      | 1↑ 1↓   |
| HER2:2+/3+                           | 7       | 2       | 1       | 5       |
|                                      | 5↑ 2↓   | 2↓      | 1↓      | 2↑ 3↓   |

↑ and ↓ mean that the miR-320a expression level in indicated samples was higher and lower than the average expression level of breast cancer samples. ER, estrogen receptor; PR, progesterone receptor; HER2, human epidermal growth factor receptor 2. The results of the IHC about HER2 test can be: 0 (negative), 1+ (also negative), 2+ (borderline), or 3+ (positive — HER2 protein overexpression).



Supplementary Table 2

(1) The proliferation of MCF-7/T47D cells transfected with indicated RNA on exposure to tamoxifen.

| TAM<br>Cell line \ RNA | INC<br>si-NC | miR-320a I<br>si-NC | INC<br>si-ARPP19 | miR-320a I<br>si-ARPP19    |
|------------------------|--------------|---------------------|------------------|----------------------------|
| MCF-7                  | 0.56         | 0.89                | 0.28             | 0.53                       |
| P value                |              | 2.11965E-04         | 3.16781E-04      | 6.94745E-04<br>2.29533E-03 |
| T47D                   | 0.54         | 0.94                | 0.30             | 0.59                       |
| P value                |              | 7.10338E-04         | 2.6966E-04       | 5.2954E-04<br>2.07726E-03  |

(2) The colony formation of MCF-7/T47D cells transfected with indicated RNA on exposure to tamoxifen.

| TAM<br>Cell line \ RNA | INC<br>si-NC | miR-320a I<br>si-NC | INC<br>si-ARPP19 | miR-320a I<br>si-ARPP19    |
|------------------------|--------------|---------------------|------------------|----------------------------|
| MCF-7                  | 62.3901801   | 96.8365894          | 30.12478176      | 69.77155352                |
| P value                |              | 4.6699E-07          | 9.47434E-06      | 4.9387E-06<br>2.87916E-05  |
| T47D                   | 54.96031746  | 96.03174603         | 31.07936508      | 64.28571429                |
| P value                |              | 8.21095E-09         | 3.99174E-7       | 8.45861E-09<br>3.07566E-05 |

(3) The proliferation of MCF-7/T47D cells transfected with indicated RNA on exposure to tamoxifen.

| TAM<br>Cell line \ RNA | INC<br>si-NC | miR-320a I<br>si-NC | INC<br>si-ERR $\gamma$ | miR-320a I<br>si-ERR $\gamma$ |
|------------------------|--------------|---------------------|------------------------|-------------------------------|
| MCF-7                  | 0.56         | 0.89                | 0.37                   | 0.69                          |
| P value                |              | 2.11965E-04         | 8.1651E-03             | 5.64645E-04<br>6.69833E-05    |
| T47D                   | 0.54         | 0.94                | 0.29                   | 0.67                          |
| P value                |              | 7.10338E-04         | 8.4916E-03             | 7.1957E-04<br>3.87126E-03     |

(4) The colony formation of MCF-7/T47D cells transfected with indicated RNA on exposure to tamoxifen.

| TAM<br>Cell line \ RNA | INC<br>si-NC | miR-320a I<br>si-NC | INC<br>si-ERR $\gamma$ | miR-320a I<br>si-ERR $\gamma$ |
|------------------------|--------------|---------------------|------------------------|-------------------------------|
| MCF-7                  | 62.3901801   | 96.8365894          | 33.71880632            | 76.89809557                   |
| P value                |              | 4.6699E-07          | 8.8611E-03             | 6.5874E-05<br>9.19273E-05     |
| T47D                   | 54.9603175   | 96.03174603         | 37.86507937            | 75.79365079                   |
| P value                |              | 8.21095E-09         | 8.4916E-03             | 2.11E-05<br>1.85256E-04       |

(1-4) The proliferation and the colony formation of MCF-7/T47D cells transfected with indicated RNA on exposure to tamoxifen. INC, inhibitor negative control; miR-320aI, microRNA-320a inhibitors. TAM, tamoxifen; The p value of each group: miR-320a I/si-NC p value, INC/si-NC vs miR-320a I/si-NC ; INC/si-RNA p value, INC/si-NC vs INC/si-RNA; miR-320a I/ si-RNA p value(up), miR-320a I/si-NC vs miR-320a I/ si-RNA; miR-320a I/ si-RNA p value(below), INC/si-RNA vs miR-320a I/ si-RNA.

Fig.1e

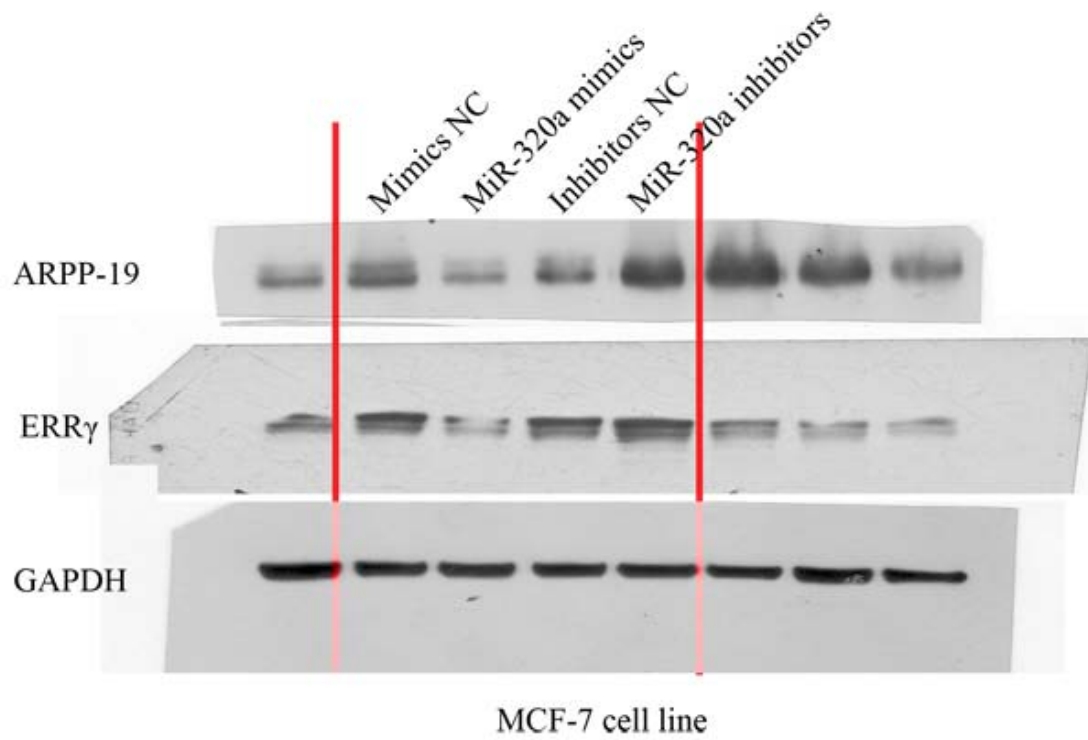

Western blot analysis of the expression levels of ARPP-19 and ERR $\gamma$  in MCF-7 cells transfected with miR-320a mimics or inhibitors.

Fig.S1e

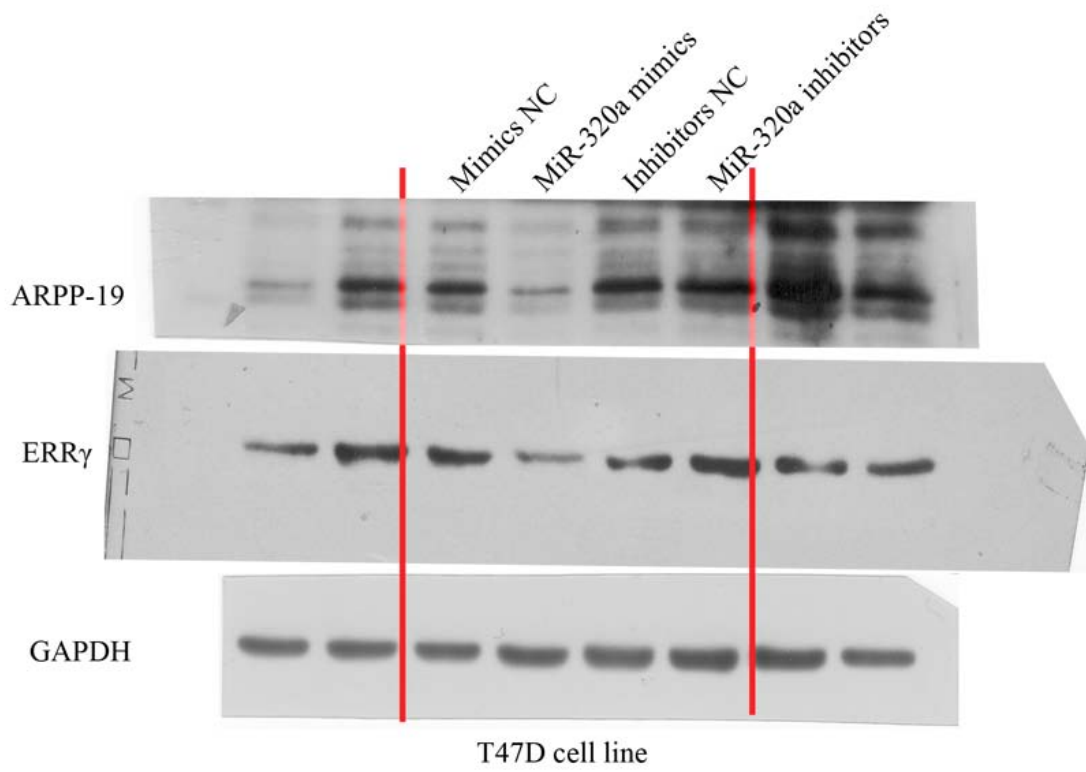

Western blot analysis of the expression levels of ARPP-19 and ERR $\gamma$  in T47D cells transfected with miR-320a mimics or inhibitors.

Fig.2a

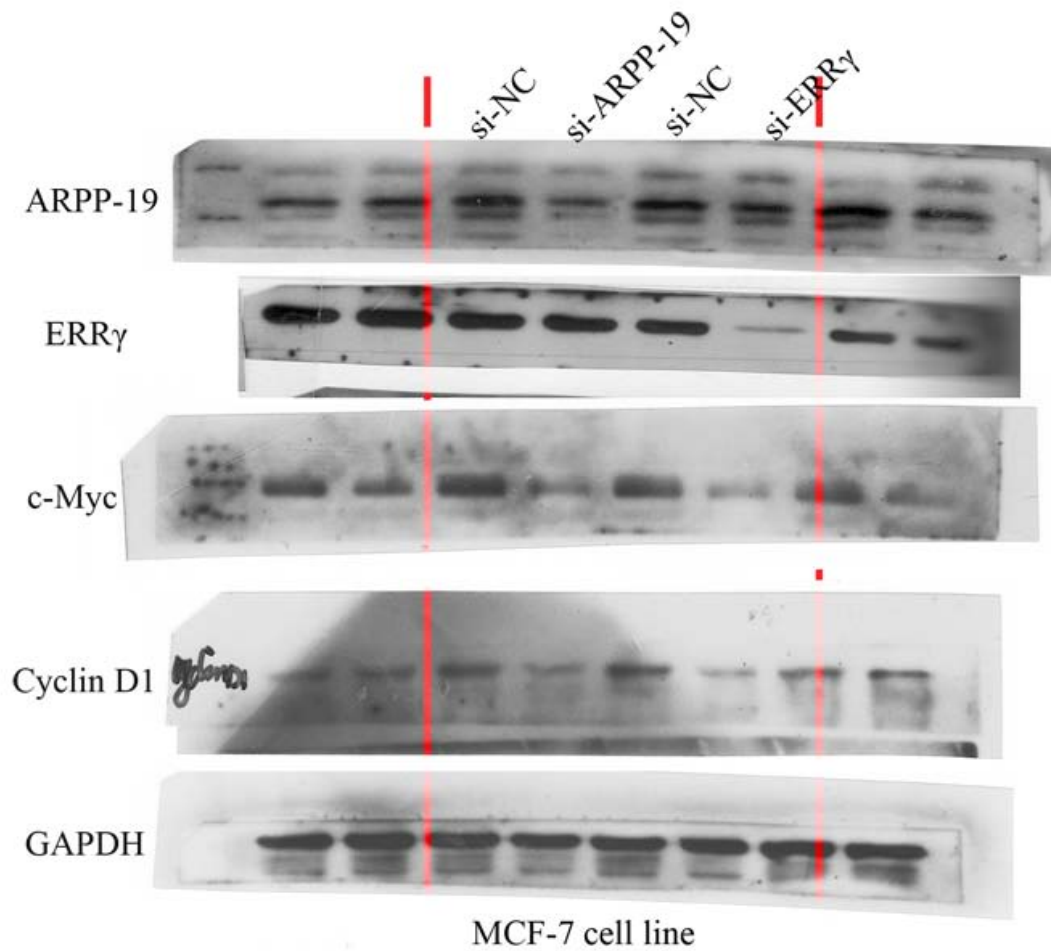

Western blot analysis of ARPP-19, ERR $\gamma$ , c-Myc, and Cyclin D1 expression levels in MCF-7 cells transfected with si-ARPP-19 and si-ERR $\gamma$ .

Fig.S2a

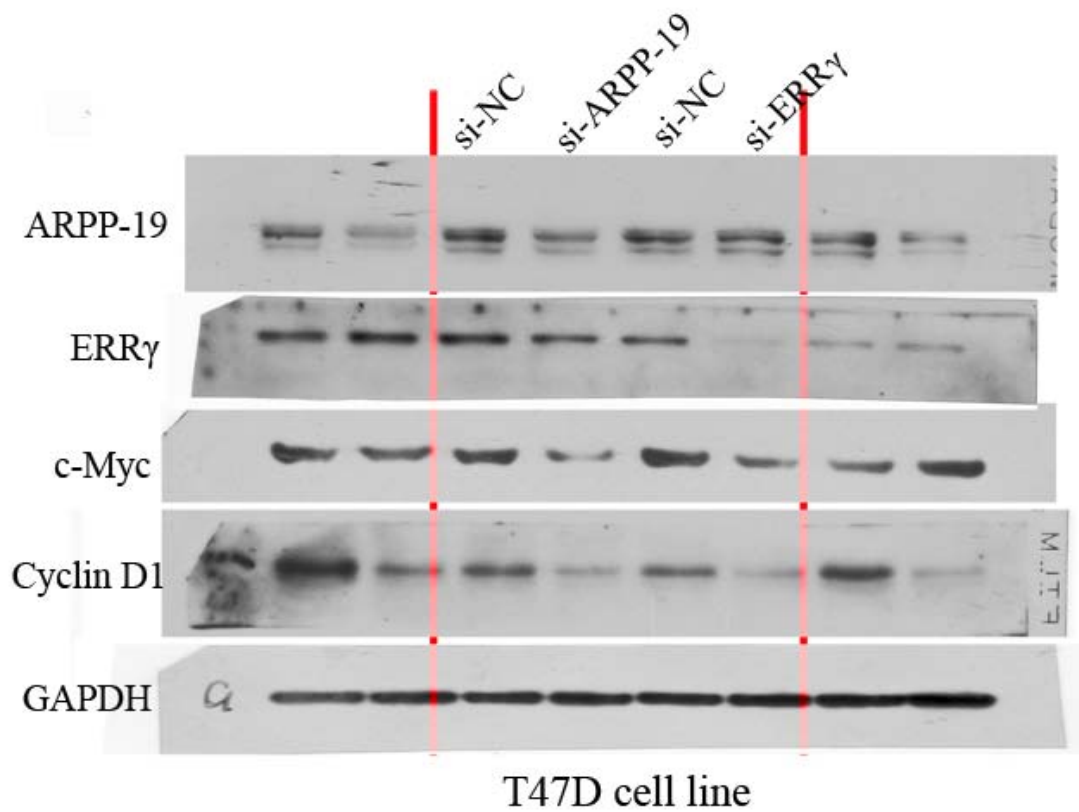

Western blot analysis of ARPP-19, ERR $\gamma$ , c-Myc, and Cyclin D1 expression levels in T47D cells transfected with si-ARPP-19 and si-ERR $\gamma$ .

Fig.2b

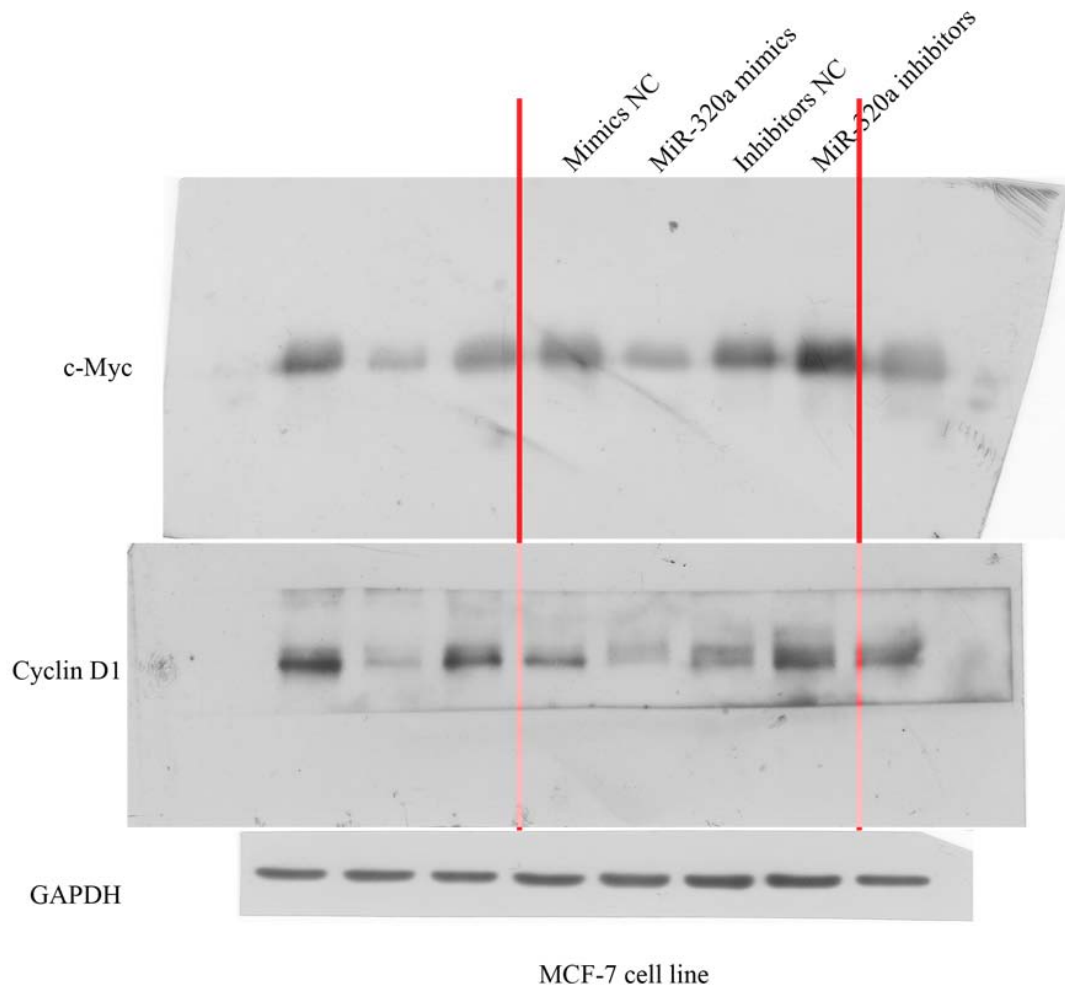

Western blot analysis of c-Myc and Cyclin D1 expression levels in MCF-7 cells transfected with miR-320a mimics / inhibitors.

Fig.S2b

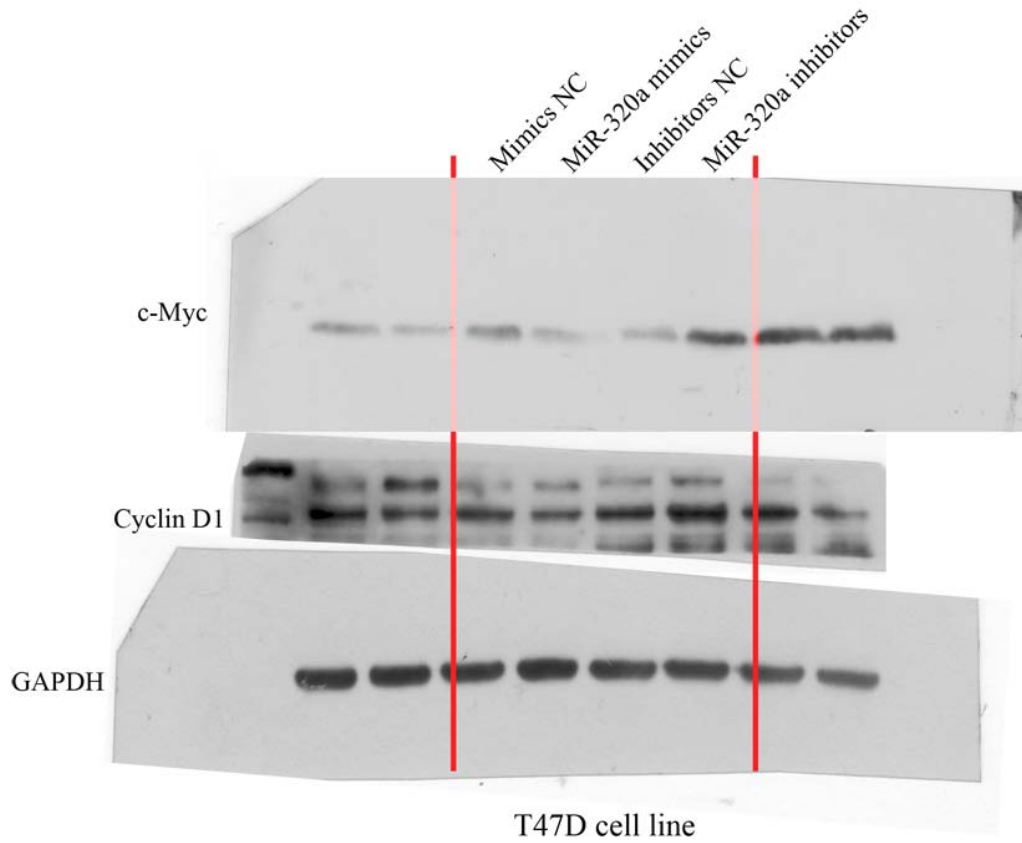

Western blot analysis of c-Myc and Cyclin D1 expression levels in T47D cells transfected with miR-320a mimics / inhibitors.



Fig.6b

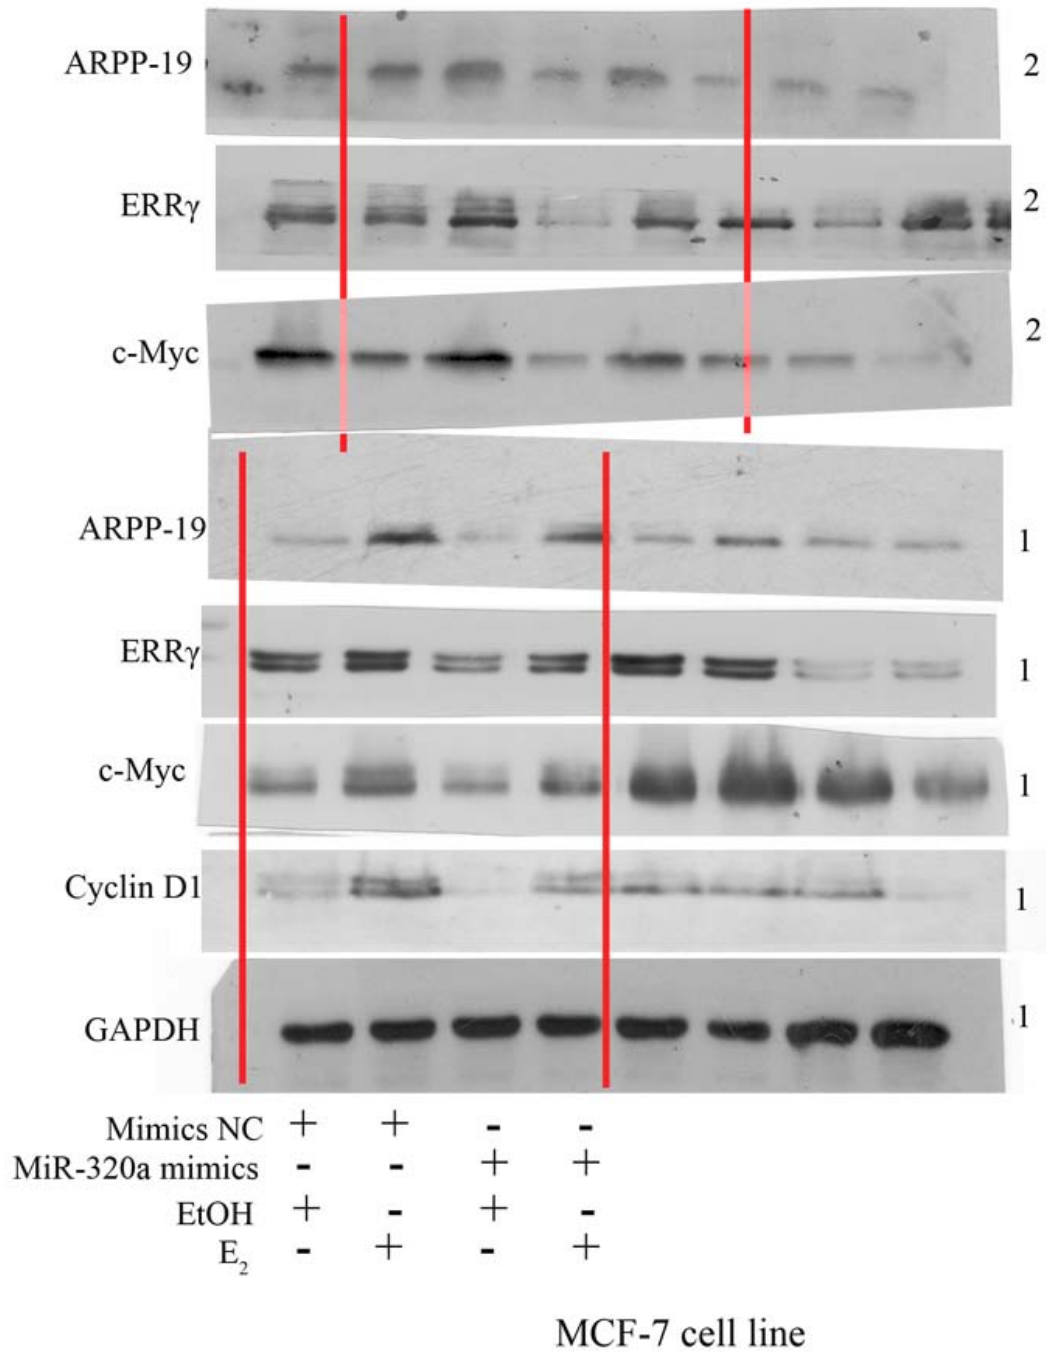

Immunoblot analysis of ARPP-19, ERR $\gamma$ , c-Myc, and Cyclin D1 levels in MCF-7 cells transfected with miR-320a mimics in the presence or absence of E<sub>2</sub> treatment.

Fig.6c

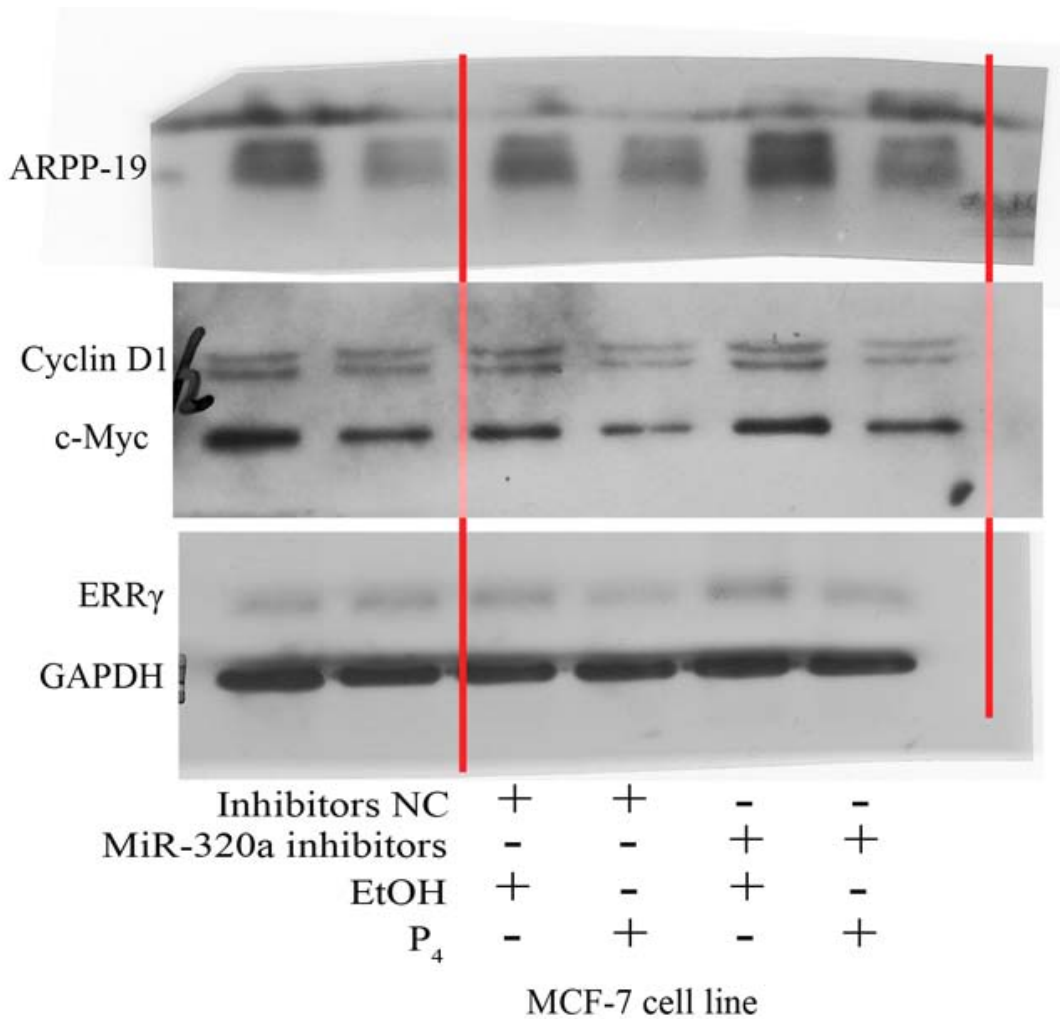

Immunoblot analysis of ARPP-19, ERR $\gamma$ , c-Myc, and Cyclin D1 levels in MCF-7 cells transfected with miR-320a inhibitors in the presence or absence of P<sub>4</sub> treatment.
